# Supplementary material for: Uncovering the Role of Natural and Synthetic Small Molecules in Counteracting the Burden of α-Synuclein Aggregates and Related Toxicity in Different Models of Parkinson’s Disease
Source: MDPI journal article supplement (doi:10.3390/ijms241713370), 2023-08-29
Supplement: s1 [file s1]

**Figure S1.** Molecular structure, source, molecular formula, and molecular weight of the discussed small molecules.

**A. Geldanamycin**

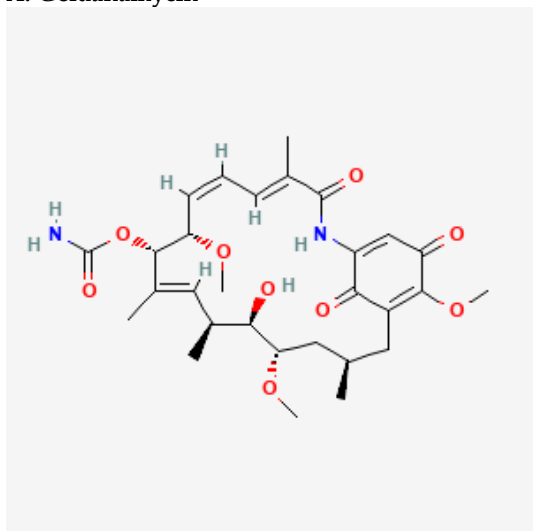

PubChem CID: 5288382  
Source: Bacteria (*S. hygroscopicus*)  
Molecular Formula:  $C_{29}H_{40}N_2O_9$   
Molecular Weight: 560.6 g/mol

**B. 17-AAG**

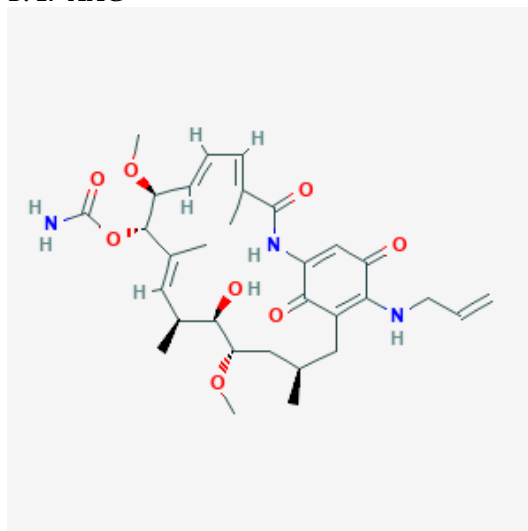

PubChem CID: 6440175  
Source: Semi-synthetic derivative of GA  
Molecular Formula:  $C_{31}H_{43}N_3O_8$   
Molecular Weight: 585.7 g/mol

**C. 17-DMAG**

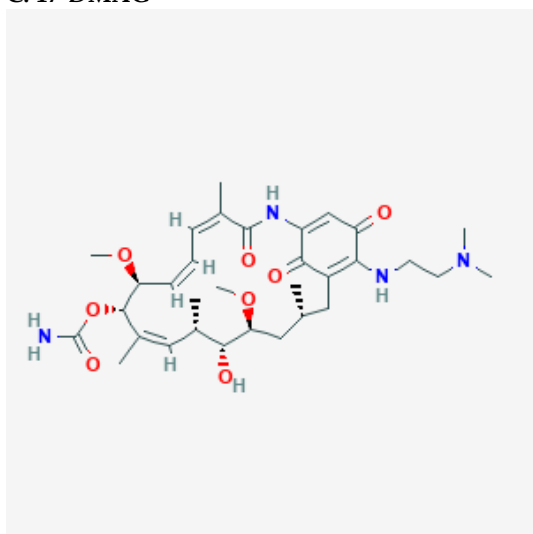

PubChem CID 9852573  
**Source:** Semi-synthetic derivative of GA  
**Molecular Formula:**  $C_{32}H_{49}ClN_4O_8$   
**Molecular Weight:** 653.2 g/mol

**D. SNX-0723**

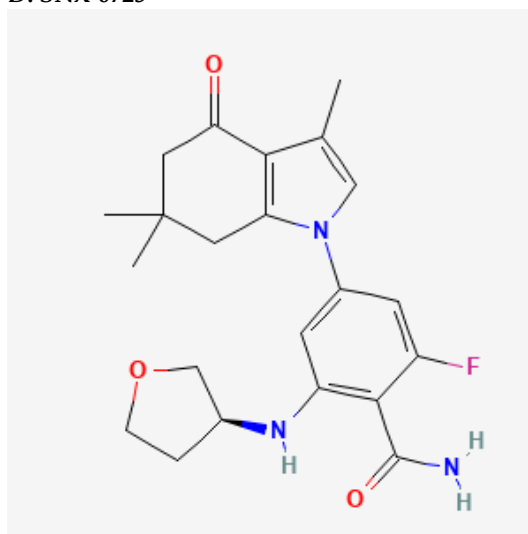

PubChem CID 67495834  
**Source:** Synthetic  
**Molecular Formula:**  $C_{22}H_{26}FN_3O_3$   
**Molecular Weight:** 399.5 g/mol

#### E. Radicicol

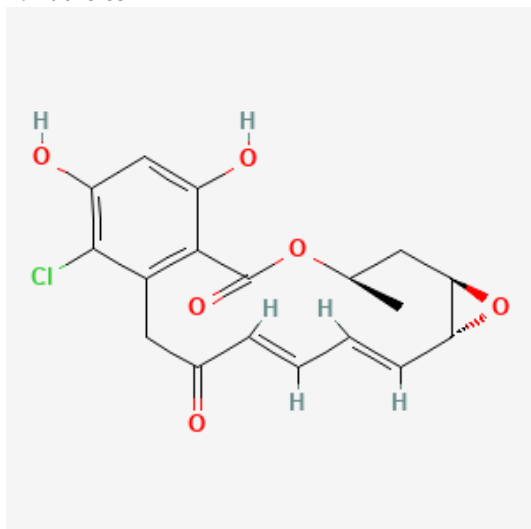

PubChem CID: 6323491

Source: *N. quadrisepata*, *H. fuscoatra*, *M. bonorden* and other fungi

Molecular Formula:  $C_{18}H_{17}ClO_6$

Molecular Weight: 364.8 g/mol

#### F. Gedunin

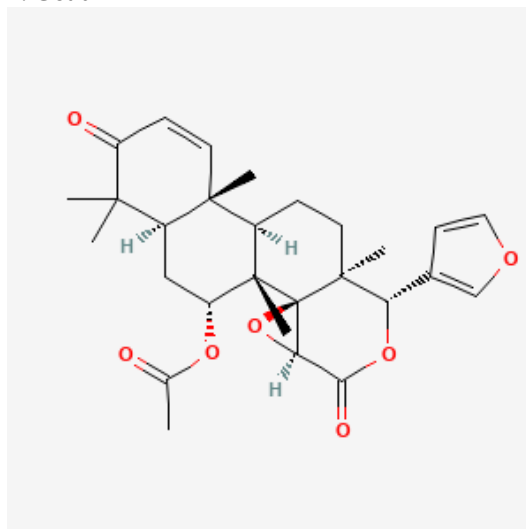

PubChem CID: 12004512

Source: *A. indica*, *C. odorata*

Molecular Formula:  $C_{28}H_{34}O_7$

Molecular Weight: 482.6 g/mol

#### G. Carbenoxolone

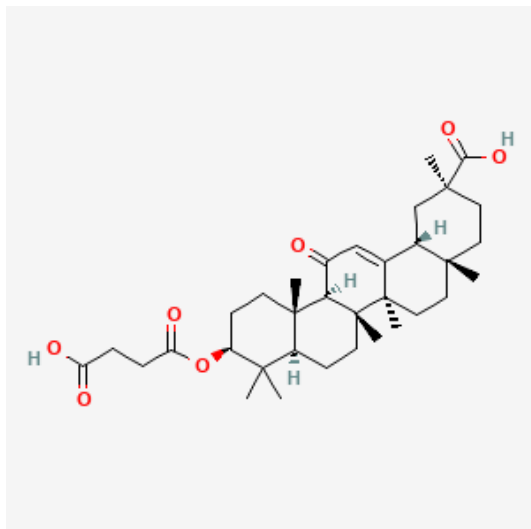

PubChem CID: 636403

Source: Synthetic

Molecular Formula:  $C_{34}H_{50}O_7$

Molecular Weight: 570.8 g/mol

#### H. Baicalein

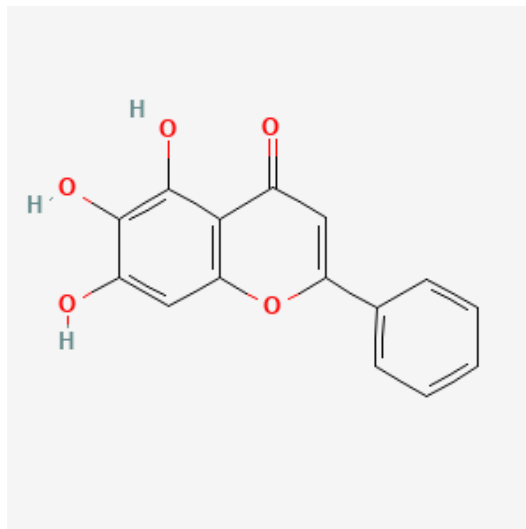

PubChem CID: 5281605

Source: *Scutellaria baicalensis* (Plant)

Molecular Formula:  $C_{15}H_{10}O_5$

Molecular Weight: 270.24 g/mol

**I. EGCG**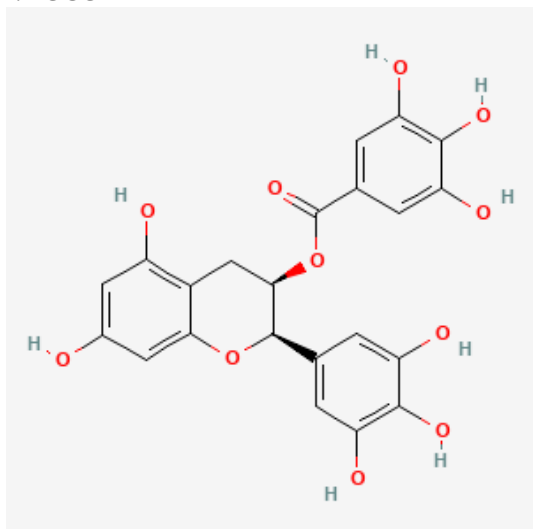

PubChem CID: 65064

Source: Green Tea

Molecular Formula:  $C_{22}H_{18}O_{11}$

Molecular Weight: 458.4 g/mol

**J. Squalamine**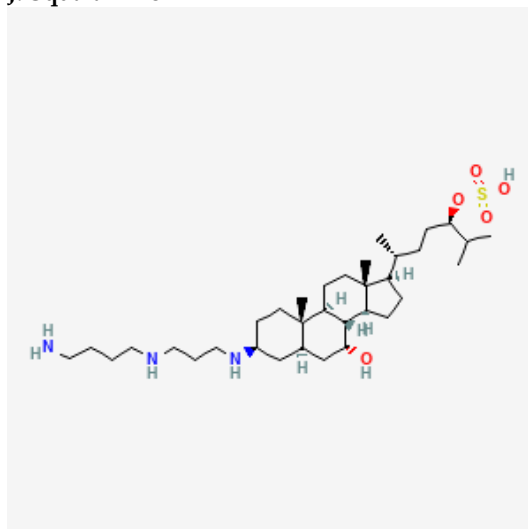

PubChem CID 72495

Source: *Squalus acanthias*

Molecular Formula:  $C_{34}H_{65}N_3O_5S$

Molecular Weight: 628 g/mol

**K. Trodusquemine**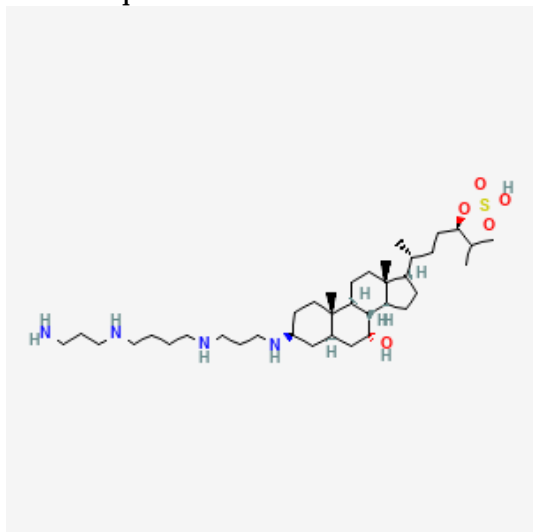

PubChem CID: 9917968

Source: *Squalus acanthias*

Molecular Formula:  $C_{37}H_{72}N_4O_5S$

Molecular Weight: 685.1 g/mol

**L. CLR01**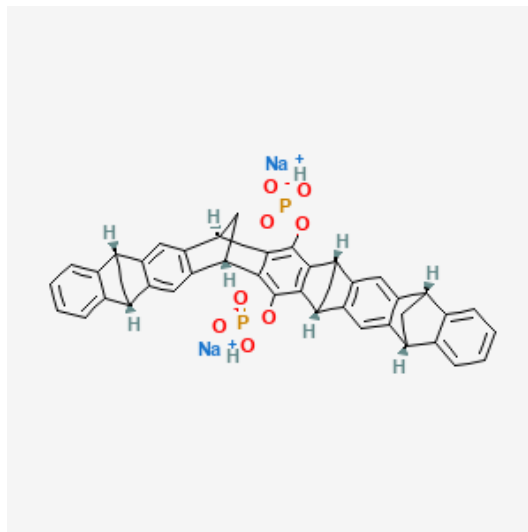

PubChem CID: 54758480

Source: Synthetic

Molecular Formula:  $C_{42}H_{30}Na_2O_8P_2$

Molecular Weight: 770.6 g/mol

All the chemical structures, molecular formula, and molecular weight were adapted from Pubchem, National Library of Medicine (<https://www.ncbi.nlm.nih.gov/>). 17-AAG: 17-(Allylamino)-17-demethoxygeldanamycin; 17-DMAG: 17-dimethylaminoethylamino-17-demethoxy-geldanamycin; EGCG: Epigallocatechin-3-gallate.
